# Supplementary material for: Folate receptor alpha in ovarian cancer tissue and patient serum is associated with disease burden and treatment outcomes
Source: PubMed Central journal article supplement (PMC9902484; doi:10.1038/s41416-022-02031-x), 2022-11-19
Supplement: 41416_2022_2031_MOESM1_ESM.pdf [file 41416_2022_2031_MOESM1_ESM.pdf]

**Supplementary Table 1: Characteristics of ovarian patients that provided serum samples.**

|                                             | <b>Neo-adjuvant</b> | <b>Adjuvant</b> | <b>Palliative</b> |
|---------------------------------------------|---------------------|-----------------|-------------------|
| <b>Number of patients</b>                   | 57                  | 33              | 53                |
| <b>Age – median (range)</b>                 | 65 (25-86)          | 59 (28-79)      | 64 (43-87)        |
| <b>Tumour histology – total number (%)</b>  |                     |                 |                   |
| Epithelial ovarian                          |                     |                 |                   |
| High grade serous                           | 54 (94.7)           | 18 (54.5)       | 44 (83.0)         |
| Low grade serous                            | 1 (1.8)             | 2 (6.1)         | 1 (1.9)           |
| Endometrioid                                | 1 (1.8)             | 1 (3.0)         | 1 (1.9)           |
| Clear cell                                  | 0 (0)               | 9 (27.3)        | 3 (5.7)           |
| Mixed                                       | 0 (0)               | 1 (3.0)         | 1 (1.9)           |
| Adult granulosa cell                        | 0 (0)               | 0 (0)           | 1 (1.9)           |
| High grade serous endometrial               | 1 (1.8)             | 0 (0)           | 0 (0)             |
| Carcinosarcoma                              | 0 (0)               | 2 (6.1)         | 2 (3.8)           |
| <b>FIGO-stage – total number (%)</b>        |                     |                 |                   |
| Stage I                                     | 0 (0)               | 10 (30.3)       | 8 (15.1)          |
| Stage II                                    | 0 (0)               | 5 (15.2)        | 1 (1.9)           |
| Stage III                                   | 31 (54.4)           | 17 (51.5)       | 37 (69.8)         |
| Stage IV                                    | 26 (45.6)           | 1 (3.0)         | 7 (13.2)          |
| <b>Debulking surgery – total number (%)</b> |                     |                 |                   |
| Optimal                                     | 29 (50.9)           | 30 (90.9)       | N/A               |
| Suboptimal                                  | 21 (36.8)           | 2 (6.1)         | N/A               |
| No debulking surgery                        | 7 (12.3)            | 1 (3.0)         | N/A               |
| <b>Primary tumour – total number (%)</b>    |                     |                 |                   |
| Ovary                                       | 45 (78.9)           | 24 (72.7)       | 42 (79.2)         |
| Fallopian tube                              | 8 (14.0)            | 9 (27.3)        | 7 (13.2)          |
| Primary peritoneal                          | 3 (5.3)             | 0 (0)           | 4 (7.5)           |
| Endometrium                                 | 1 (1.8)             | 0 (0)           | 0 (0)             |
| <b>Menopausal status – total number (%)</b> |                     |                 |                   |
| Post-menopausal                             | 45 (78.9)           | 22 (66.7)       | 45 (84.9)         |
| Pre-menopausal                              | 2 (3.5)             | 2 (6.1)         | 0 (0)             |
| Unknown                                     | 10 (17.5)           | 9 (27.3)        | 8 (15.1)          |

**Supplementary Table 2: Tumour Burden Score**

|                                                                                                           | <b>Example 1</b>   | <b>Example 2</b>     | <b>Example 3</b>     |
|-----------------------------------------------------------------------------------------------------------|--------------------|----------------------|----------------------|
| <b>Site of disease (1 point per site)</b>                                                                 |                    |                      |                      |
| Lung                                                                                                      | 0                  | 0                    | 0                    |
| Pleural                                                                                                   | 0                  | 0                    | 0                    |
| Pleural Effusion                                                                                          | 0                  | 1                    | 0                    |
| Liver                                                                                                     | 0                  | 1                    | 1                    |
| Spleen                                                                                                    | 0                  | 0                    | 1                    |
| Soft Tissue                                                                                               | 0                  | 0                    | 0                    |
| Peritoneal Nodularity                                                                                     | 0                  | 1                    | 1                    |
| Pelvic Mass                                                                                               | 0                  | 1                    | 1                    |
| Ascites                                                                                                   | 1                  | 1                    | 1                    |
| Lymph nodes                                                                                               | 1                  | 1                    | 4                    |
| Bone                                                                                                      | 0                  | 0                    | 0                    |
| <b>Sub-Total</b>                                                                                          | <b>2</b>           | <b>6</b>             | <b>9</b>             |
| <b>Number of metastases per site (1-2 = 1 point), (2-4 = 2 points), (<math>\geq 5 = 3</math> points)</b>  |                    |                      |                      |
| Lung                                                                                                      | 0                  | 0                    | 0                    |
| Pleural                                                                                                   | 0                  | 0                    | 0                    |
| Pleural Effusion                                                                                          | 0                  | 1                    | 0                    |
| Liver                                                                                                     | 0                  | 1                    | 2                    |
| Spleen                                                                                                    | 0                  | 0                    | 2                    |
| Soft Tissue                                                                                               | 0                  | 0                    | 0                    |
| Peritoneal Nodularity                                                                                     | 0                  | 1                    | 1                    |
| Pelvic Mass                                                                                               | 0                  | 1                    | 1                    |
| Ascites                                                                                                   | 1                  | 1                    | 1                    |
| Lymph nodes                                                                                               | 1                  | 1                    | 1                    |
| Bone                                                                                                      | 0                  | 0                    | 0                    |
| <b>Sub-Total</b>                                                                                          | <b>2</b>           | <b>6</b>             | <b>8</b>             |
| <b>Maximum metastasis diameter per site (&lt;2cm = 1 point), (2-5cm = 2 points), (&gt;5cm = 3 points)</b> |                    |                      |                      |
| Lung                                                                                                      | 0                  | 0                    | 0                    |
| Pleural                                                                                                   | 0                  | 0                    | 0                    |
| Pleural Effusion                                                                                          | 0                  | 1                    | 0                    |
| Liver                                                                                                     | 0                  | 3                    | 3                    |
| Spleen                                                                                                    | 0                  | 0                    | 3                    |
| Soft Tissue                                                                                               | 0                  | 0                    | 0                    |
| Peritoneal Nodularity                                                                                     | 0                  | 1                    | 2                    |
| Pelvic Mass                                                                                               | 0                  | 3                    | 3                    |
| Ascites                                                                                                   | 1                  | 1                    | 1                    |
| Lymph nodes                                                                                               | 1                  | 1                    | 2                    |
| Bone                                                                                                      | 0                  | 0                    | 0                    |
| <b>Sub-Total</b>                                                                                          | <b>2</b>           | <b>10</b>            | <b>14</b>            |
| <b>Total Tumour Burden Score</b>                                                                          | <b>(2+2+2) = 6</b> | <b>(6+6+10) = 22</b> | <b>(9+8+14) = 31</b> |

# Supp. Figure 1

## A

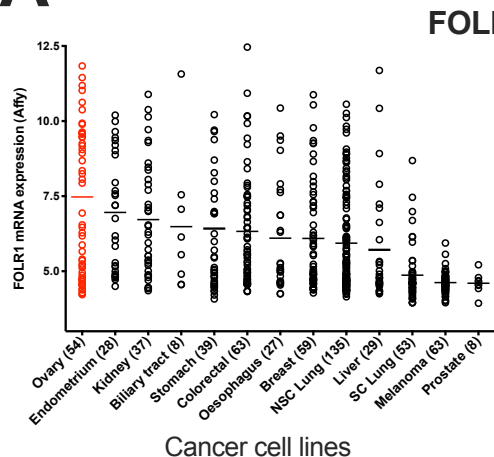

## B

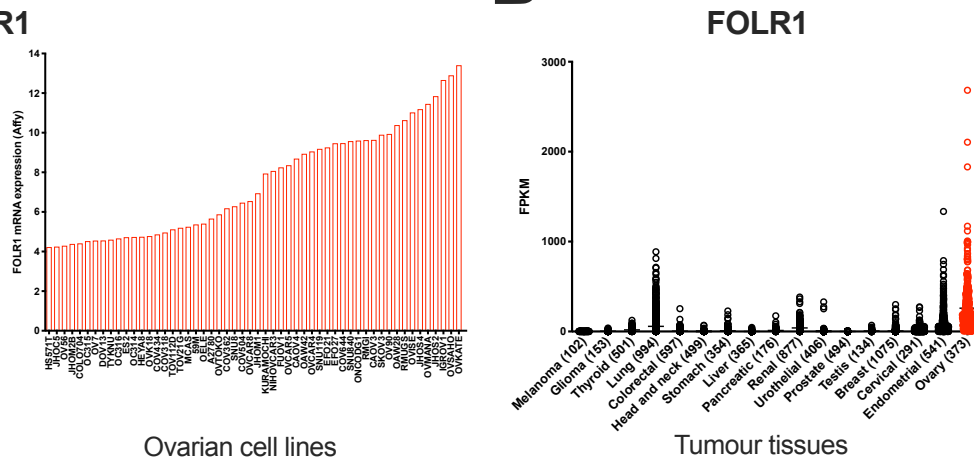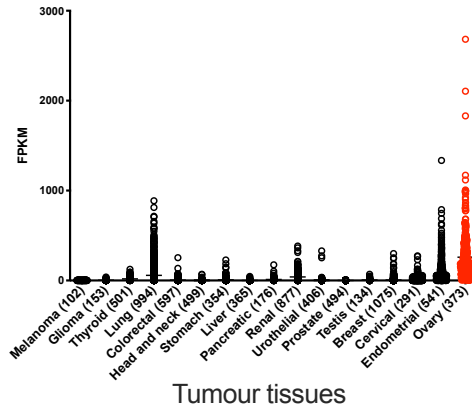

## C

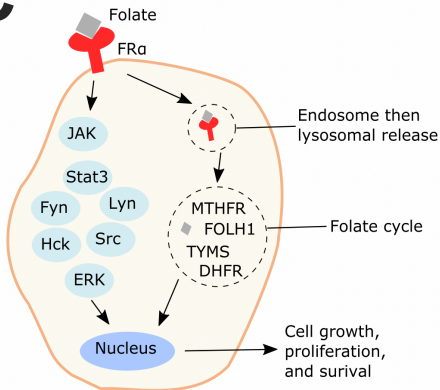

## D

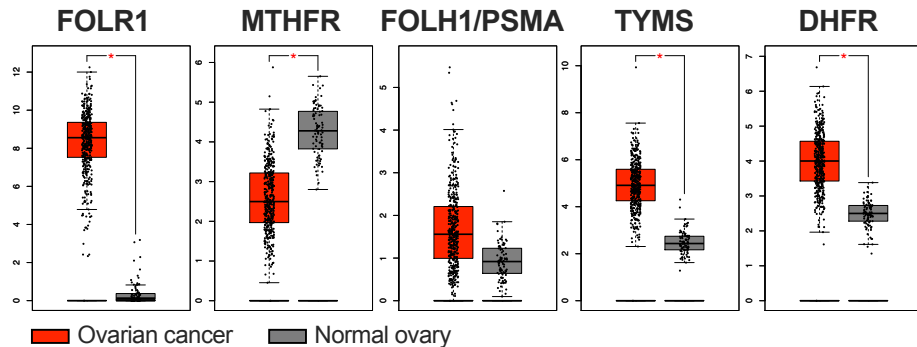

# Supp. Figure 2

Tumour cytoplasmic FR $\alpha$  expression

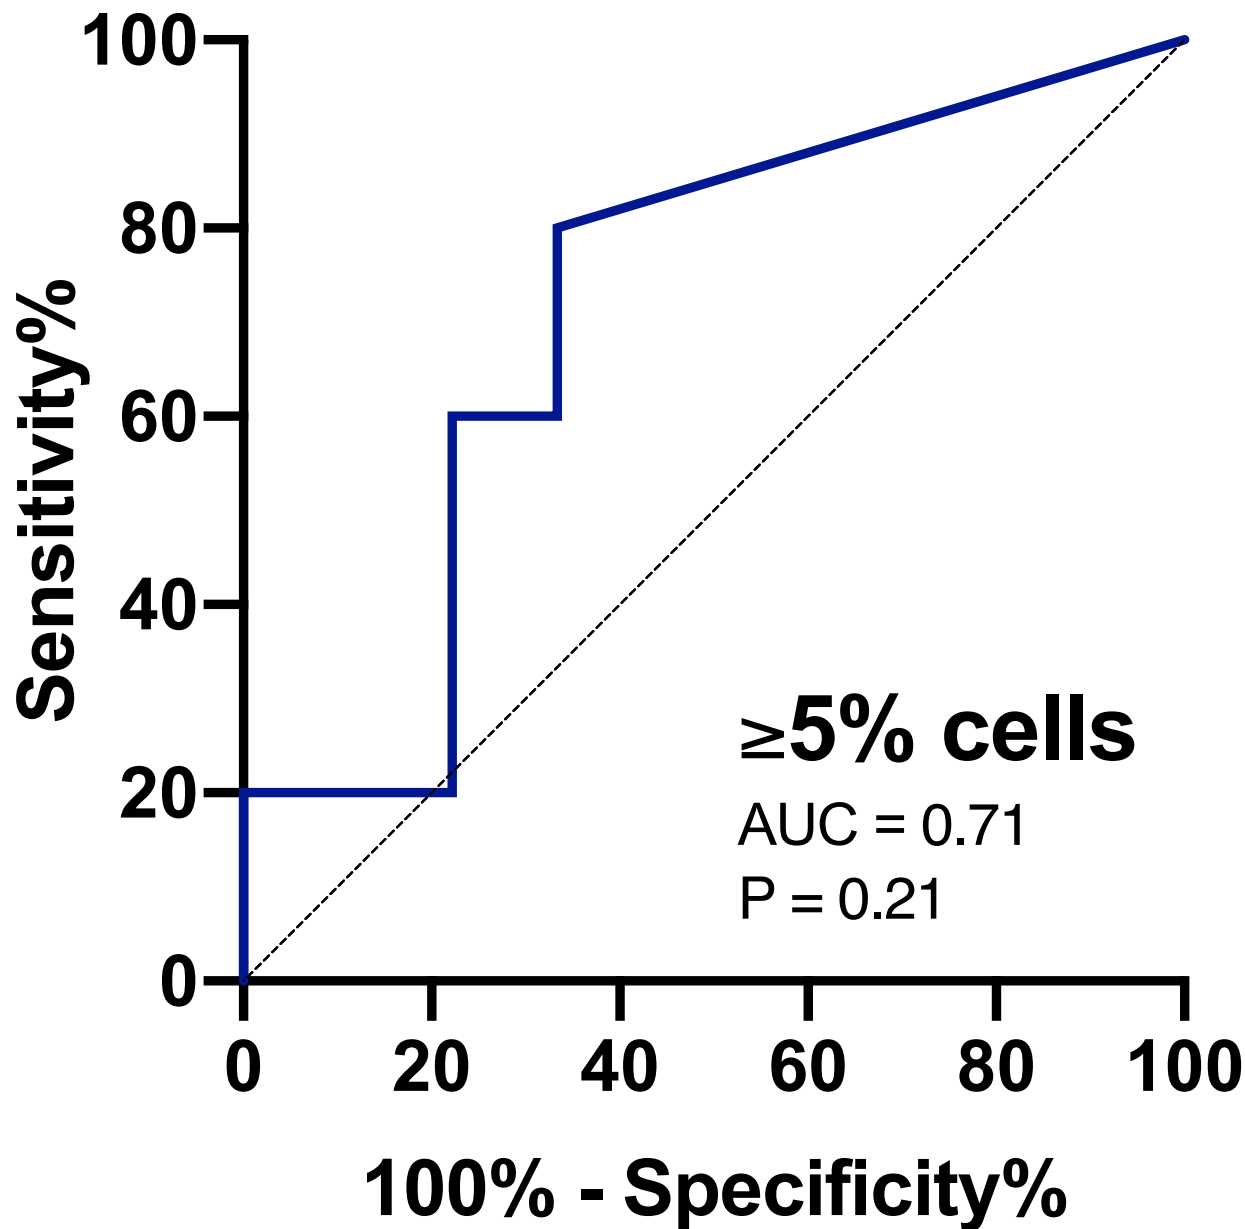

# Supp. Figure 3

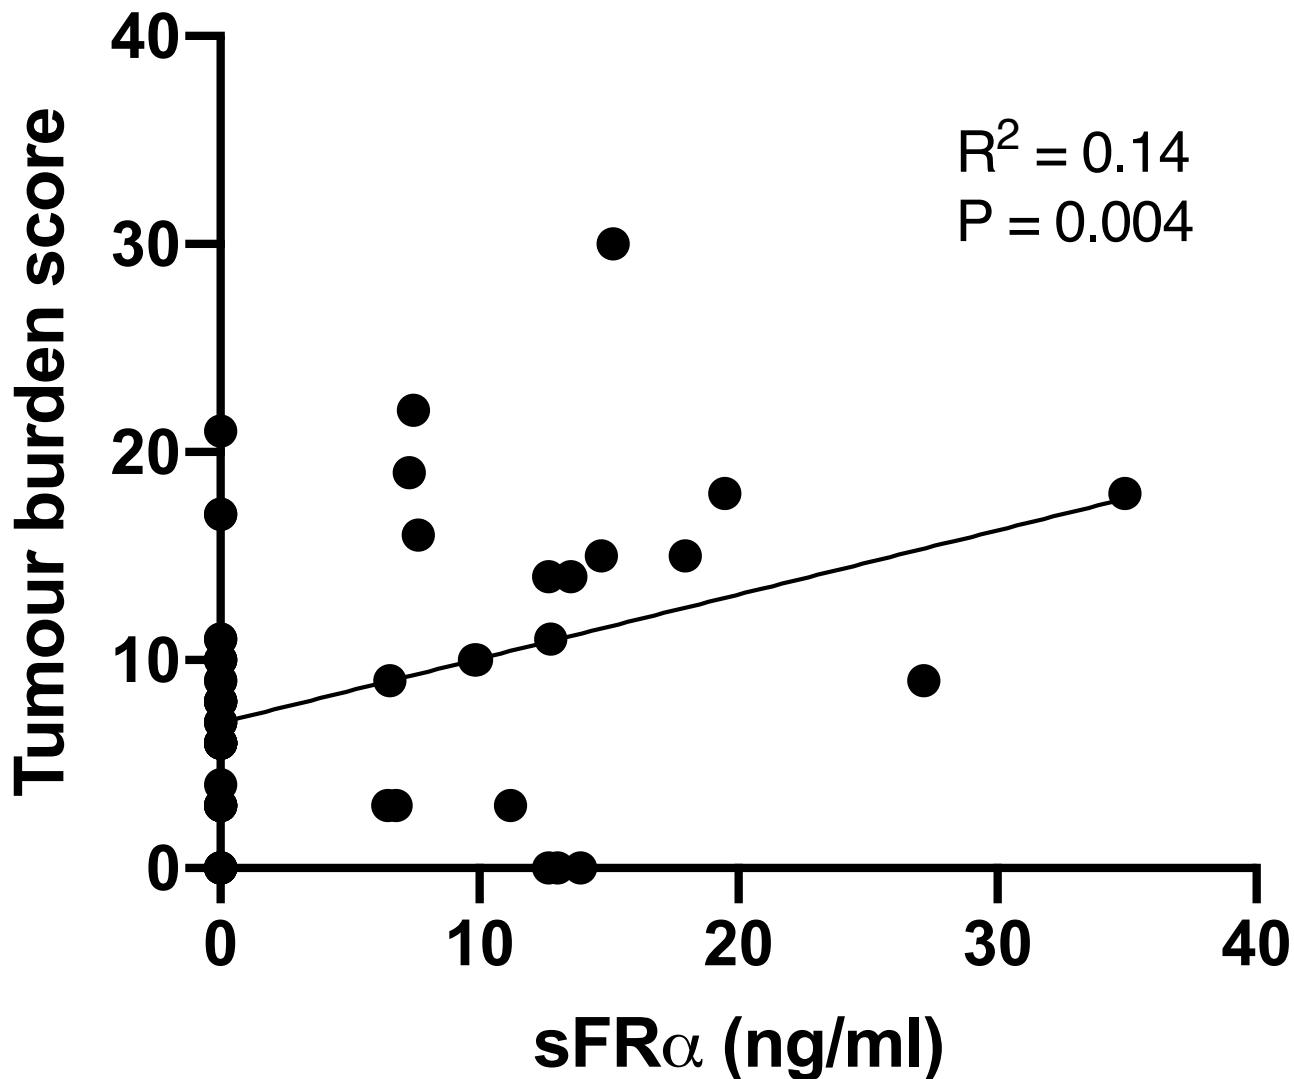

## Supplementary Figure Legends

**Supplementary Figure 1: High *FOLR1* gene expression in ovarian cancers.** A: Gene expression levels of *FOLR1* (encoding FR $\alpha$ ) measured in human cancer cell lines (left, 10 top- and 3-lowest expressing cancer types shown, N numbers indicated in parentheses) and across ovarian cancer cell lines (right) (Cancer Cell Line Encyclopedia (CCLE) online tool) indicate high relative expression in ovarian cancer cells. B: Gene expression levels (fragments per kilobase of exon per million mapped fragments, FPKM) were also elevated in human ovarian cancer tissues (N numbers indicated in parentheses; The Human Protein Atlas online tool <sup>1,2</sup>). C: The folate/FR $\alpha$  signaling pathway involves intracellular molecules, e.g., *MTHFR*, *FOLH1*, *TYMS*, and *DHFR*, and is associated with cell growth, proliferation and survival. D: *FOLR1*, and folate pathway signaling molecules are differentially expressed in ovarian cancer in relation to normal ovary tissues (Gene Expression Profiling Interactive Analysis (GEPIA) online tool <sup>3</sup>; ovarian tumours, N=426; normal ovary tissues, N=88).

**Supplementary Figure 2: Receiver operating characteristic (ROC) curve analysis evaluating the capability of sFR $\alpha$  to predict cytoplasmic FR $\alpha$  expression in tumours.** In the neo-adjuvant treatment-naïve patient group, sFR $\alpha$  concentration was not predictive of cytoplasmic FR $\alpha$  expression in the patients' tumour. Statistical test: receiver operating characteristic (ROC) curve analyses.

**Supplementary Figure 3: Correlation between tumour burden score and sFR $\alpha$ .** In the neo-adjuvant treatment-naïve patient group, a modest correlation was observed between tumour burden score and the level of circulating of sFR $\alpha$ .

- 1 Gyorffy, B., Lanczky, A. & Szallasi, Z. Implementing an online tool for genome-wide validation of survival-associated biomarkers in ovarian-cancer using microarray data from 1287 patients. *Endocr Relat Cancer* **19**, 197-208 (2012).
- 2 Uhlen, M., Zhang, C., Lee, S., Sjöstedt, E., Fagerberg, L., Bidkhori, G. *et al.* A pathology atlas of the human cancer transcriptome. *Science* **357** (2017).
- 3 Tang, Z., Li, C., Kang, B., Gao, G., Li, C. & Zhang, Z. GEPIA: a web server for cancer and normal gene expression profiling and interactive analyses. *Nucleic Acids Res* **45**, W98-W102 (2017).
